# Supplementary material for: Variation in fiberoptic bead-based oligonucleotide microarrays: dispersion characteristics among hybridization and biological replicate samples
Source: Springer Nature journal article supplement (doi:10.1186/1745-6150-1-18), 2006-06-20
Supplement: Additional file 2 [file 1745-6150-1-18-s2.doc]

## Additional file 2 – Supplemental Figure S2, comparison of the pooled reference samples C5a and C5b before renormalization

## Running mean of 90 genes, before renormalization.
