# Supplementary material for: Variation in fiberoptic bead-based oligonucleotide microarrays: dispersion characteristics among hybridization and biological replicate samples
Source: Springer Nature journal article supplement (doi:10.1186/1745-6150-1-18), 2006-06-20
Supplement: Additional file 3 [file 1745-6150-1-18-s3.doc]

## Additional file 3 – Supplemental Figure 3, comparison of the pooled reference samples C5a and C5b after renormalization

## Dispersion pattern and 0.9 probability interval, after normalization.
