# Supplementary material for: Variation in fiberoptic bead-based oligonucleotide microarrays: dispersion characteristics among hybridization and biological replicate samples
Source: Springer Nature journal article supplement (doi:10.1186/1745-6150-1-18), 2006-06-20
Supplement: Additional file 5 [file 1745-6150-1-18-s5.doc]

## Additional file 5 – Supplemental Figure S5, quantile-quantile plot of the frequency distribution

## Comparison of the observed expressions with the corresponding inverse normal distribution, combined samples C1a, C2a, C3a, C4a, C5a: range of average expressions from 0.1 to 2.0; figure shows the relative values (expressions divided by the mean of five arrays).
