# Supplementary material for: Variation in fiberoptic bead-based oligonucleotide microarrays: dispersion characteristics among hybridization and biological replicate samples
Source: Springer Nature journal article supplement (doi:10.1186/1745-6150-1-18), 2006-06-20
Supplement: Additional file 6 [file 1745-6150-1-18-s6.doc]

## Additional file 6 – Supplemental Figure 6 - Quantile-quantile plot of the frequency distribution

## Comparison of the observed expressions with the corresponding inverse normal distribution, combined samples C1a, C2a, C3a, C4a, C5a6: range of average expressions from 117 to 5432.
